1                                    Learning and motor-impulse control in domestic fowl and crows

2    Claudia A.F. Wascher<sup>1\*</sup>, Katie Allen<sup>1</sup> & Georgine Szípl<sup>2</sup>

3

4    <sup>1</sup>Behavioural Ecology Research Group, School of Life Sciences, Anglia Ruskin University, United  
5    Kingdom

6    <sup>2</sup>Konrad Lorenz Forschungsstelle, Core facility, University of Vienna, Austria

7

8    \*Corresponding author: [Claudia A.F. Wascher](mailto:Claudia A.F. Wascher): School of Life Sciences, Anglia Ruskin University, East

9    Road, Cambridge, CB1 1PT United Kingdom; Phone: +4369912381419; e-mail:

10    [claudia.wascher@gmail.com](mailto:claudia.wascher@gmail.com)

11 **Abstract**

12 Cognitive abilities allow animals to navigate through complex, fluctuating environments. For  
13 example, behavioural flexibility, which is the ability of an animal to alter their behaviour in response  
14 to a novel stimulus or to modify responses to as familiar stimulus or behavioural inhibition, defined  
15 as the ability to control a response in order to choose a conflicting course of action. Behavioural  
16 flexibility and inhibitory control are expected to vary between and within species based on socio-  
17 ecological factors. In the present study we compared performance of a captive group of eight  
18 crows, *Corvus corone*, and ten domestic fowl, *Gallus gallus domesticus*, in two cognitive tasks, the  
19 cylinder task as a test of motor inhibitory control, and reversal learning as a measure of learning  
20 ability and behavioural flexibility. Four crows and nine fowl completed the cylinder task, eight crows  
21 completed the reversal learning experiment and nine fowl were tested in the acquisition phase,  
22 however three fowl did not complete the reversal phase of the experiment due to time constraints.  
23 Crows performed significantly better in the cylinder task compared to domestic fowl. In the reversal  
24 learning experiment, species did not significantly differ in the number of trials until learning  
25 criterion was reached. In crows, individuals who needed less trials to reach learning criterion in the  
26 acquisition phase also needed less trials to reach the criterion in the reversal phase. This  
27 relationship was lacking in domestic fowl. Performance in the learning task did not correlate with  
28 performance in the cylinder task in domestic fowl. Our results show crows to possess significantly  
29 better motor-inhibitory control compared to domestic fowl, which could be indicative of this  
30 specific aspect of executive functioning to be lacking in domestic fowl. In contrast learning  
31 performance in a reversal learning task did not differ between crows and domestic fowl, indicating  
32 similar levels of behavioural flexibility in both species.

33

34 **Key words:** carrion crows, domestic fowl, inhibitory control, motor inhibition, reversal learning,

## 35 Introduction

36 Cognitive abilities allow animals to navigate through complex, fluctuating environments. For  
37 example, an animals' ability to alter their behaviour in response to a novel stimulus and to modify  
38 responses to familiar stimuli is termed behavioural flexibility, which critically affects survival and  
39 fitness of individuals (Shettleworth, 2009). Similarly, changing environmental context might require  
40 the inhibition of previously successful behavioural strategies. Behavioural inhibition is the ability to  
41 control a response in order to choose a conflicting course of action (Duque & Stevens, 2017).  
42 Environmental uncertainty can negatively affect inhibitory control. Pheasants, *Phasianus colchicus*,  
43 for whom a previously learned association between a visual cue and a food reward was perturbed  
44 in order to simulate environmental uncertainty, performed worse in an inhibitory control task  
45 compared to control individuals (Griffin et al., 2020).

46  
47 A common test of behavioural flexibility is the reversal learning task, where an individual has  
48 to learn a discrimination task and subsequently must respond to the previously unrewarded  
49 stimulus (Izquierdo et al., 2017). A common test of behavioural inhibition is the cylinder task. In this  
50 detour task, individuals are trained to take a food reward from an opaque cylinder or tube, which is  
51 open at both ends. Once individuals are comfortable to do this, the opaque cylinder is replaced by a  
52 transparent one. The focal individual's ability to inhibit the motor impulse to try to reach the  
53 reward through the long side of the cylinder and detour to take the reward from the open ends is  
54 assessed (Kabadayi et al., 2018).

55  
56 Cognitive flexibility and inhibitory control are expected to vary between and within species  
57 based on socio-ecological factors. In recent years, behavioural inhibition performance has been

58 tested in a wide range of species (for example: cognitive flexibility: great tits, *Parus major*: Cauchoix  
59 et al. 2017; kea, *Nestor notabilis*: O'Hara et al. 2015; red-footed tortoise, *Chelonoidis carbonarius*:  
60 Bridgeman and Tattersall 2019; inhibitory control: cats, *Felis catus*: Bobrowicz and Osvath 2018;  
61 common waxbills, *Estrilda astrild*: Gomes et al. 2020; dogs, *Canis familiaris*: Brucks et al. 2017;  
62 goats, *Capra aegagrus hircus*: Langbein 2018; great tits, *Parus major*: Isaksson et al. 2018; guppies,  
63 *Poecilia reticulata*: Lucon-Xiccato et al. 2017; sailfin molly, *Poecilia latipinna*: Gibelli et al. 2019;  
64 vervet monkeys, *Chlorocebus pygerythrus*: Kumpan et al. 2020). A large-scale study by MacLean et  
65 al. (2014) compared inhibitory abilities in 36 species and found a positive correlation between  
66 absolute brain size and motor self-regulatory performance. Amongst birds tested, different corvid  
67 species (common ravens, *Corvus corax*, New Caledonian crows, *Corvus moneduloides*, and Western  
68 jackdaws, *Corvus monedula*) displayed the highest levels of impulse control (Kabadayi et al., 2016).  
69 In hyenas, *Crocuta crocuta*, individuals living in larger groups exhibited greater inhibitory control  
70 (Johnson-Ulrich & Holekamp, 2020), however inhibitory control was not associated with the ability  
71 to innovate (Johnson-Ulrich et al., 2018). Next to species differences, cognitive performance in  
72 animals also differs between individuals, for example based on sex (Range et al., 2006) or  
73 personality (Dougherty & Guillette, 2018). Individual difference in cognitive performance is  
74 relatively understudied and only recently the importance to understand causes and consequences  
75 of individual variation in cognitive performance has been acknowledged (Boogert et al., 2018). In  
76 addition to understanding variation in cognitive performance, it is also critical to further investigate  
77 temporal (correlations in performance across different times) and contextual (correlations in  
78 performance across different tasks) repeatability of performance (Cauchoix et al., 2017).

79

80 In the last decades, the cognitive abilities of corvids have been heavily studied (Taylor, 2014;  
81 Wascher, 2018). For example, black-billed magpies, *Pica hudsonia*, performed similarly compared to

82 different monkey species in a basic concept learning task (Wright et al., 2017), and jungle crows,  
83 *Corvus macrorhynchos*, learned to discriminate shapes and form concepts (Bogale & Sugita, 2014).  
84 In a reversal learning task, New Caledonian crows and carrion crows showed similar performance  
85 (Teschke et al., 2013). Corvids paralleled performance of great apes in a motor-inhibition task  
86 (Kabadayi et al., 2016) and carrion crows as well as common ravens were able to delay gratification  
87 in a qualitative, but not quantitative context (Dufour et al., 2012; Hillemann et al., 2014; Wascher et  
88 al., 2012). In contrast to corvids, fewer studies have investigated the cognitive abilities of domestic  
89 fowl, *Gallus gallus domesticus*. Inhibitory control in fowl is related to keeping conditions. In a study  
90 by Ferreira et al. (2020) domestic fowl showed low levels of motor impulse control in the cylinder  
91 task. Impulse control was further affected by range, and high rangers showed a poorer  
92 performance compared to low rangers. In red junglefowl, *Gallus gallus*, cognitive flexibility and  
93 exploratory behaviour correlated in an age and sex dependent manner. More explorative chicks  
94 showed higher cognitive flexibility compared to less explorative ones, while the opposite  
95 association was found for adult females (Zidar et al., 2018). Both groups, corvids and fowl are  
96 considered to organise in complex social systems (Garnham & Løvlie, 2018; Wascher, 2018), which  
97 is assumed a driving factor in the evolution of cognitive skills (Dunbar, 1998).

98

99 In the present study we investigated the performance of crows and domestic fowl in two  
100 cognitive tasks, the cylinder task as a test of motor inhibitory control, and reversal learning as a  
101 measure of learning ability and behavioural flexibility. We expected to replicate previous findings of  
102 high levels of motor inhibition in crows, but not in chickens. Further, we expect corvids to learn a  
103 colour discrimination task quicker compared to chickens and to show higher behavioural flexibility.

104

## 105 **Methods**

### 106 *Subjects and housing*

107           Eight crows have been tested, 7 carrion crows, *Corvus corone corone*, and 1 hooded crow,  
108 *Corvus corone cornix*. All crows were tested at the Konrad Lorenz research station (KLF) in Grünau,  
109 Austria from October 2010 to August 2012. Crows were held in large outdoor aviaries (15 m<sup>2</sup>),  
110 either in male-female pairs or trios. Testing was conducted either in the main aviary with one  
111 animal visually and spatially separated from the others, or in a separate, spacious testing room,  
112 which birds entered voluntarily upon request. Rewards consisted of greaves and cheese. All focal  
113 individuals were hand-raised between 2007 and 2011, either at the KLF or by private people. Crows  
114 were captured and brought into captivity by private people, when taken out of the nest at a young  
115 age by unfavorable weather conditions.

116

117           Domestic fowl, *Gallus gallus domesticus*, were housed at a stable yard in Piddinghoe,  
118 Newhaven in East Sussex and tested from June to August 2019. Flock consisted of thirteen female  
119 individuals and one rooster. The fowl had outdoor and indoor access during the day and were kept  
120 in a shed at night. Ten female domestic fowl were selected based on their tameness and willingness  
121 to follow the experimenter into a spacious test enclosure. One individual was excluded from the  
122 experiment due to becoming agitated and reluctant to enter the test area in the course of the  
123 experiment. At the time of the experiments, fowl were approximately one to two years old. Fowl  
124 were rewarded with grapes.

125

126           Experiments complied with Austrian and UK government guidelines. As experiments were  
127 entirely non-invasive, no further animal experimental license was required. Experiments on  
128 domestic fowl have been approved by the School of Life Sciences ethics panel at Anglia Ruskin

129 University. All individuals participated and entered the experimental compartments voluntarily.  
130 Individuals were held in captivity before and after completion of the present study.

131

### 132 *Experiment 1: The Detour Task*

133 Four crows and nine fowl were tested in this task. The experimenter placed a food reward in  
134 an opaque cylinder, while the focal individuals were watching. The cylinder needed to be  
135 sufficiently long so that the birds could obtain the reward at the centre of the cylinder by inserting  
136 their head through the opening, but not too large so that the birds could not enter the cylinder with  
137 their whole body. Crows received ten trials per session, this number had to be reduced to five trials  
138 per session for the domestic fowl, in order to keep motivation of individuals high. A correct  
139 response was considered when an individual retrieved the reward from either of the openings,  
140 without any prior contact with the long side of the cylinder. In order to pass the first stage of the  
141 detour task, individuals were required to complete at least five successful retrieves in a row. Once  
142 the first stage of the experiment was completed, individuals were presented with the transparent  
143 cylinder. Similar to the first stage, a food reward was placed in the cylinder in front of the focal  
144 individual. Crows received one test session consisting of ten trials and fowl two test sessions  
145 consisting of five trials. Therefore, overall each individual received ten trials. The number of correct  
146 responses was recorded similarly to stage one of the experiments.

147

### 148 *Experiment 2: The Reversal Task*

149 Eight crows and nine fowl participated in this experiment. Data on learning performance  
150 from four focal crows has been previously published (Teschke et al., 2013). The apparatus consisted  
151 of two feeders that were mounted 30 cm apart on a wooden board. Feeders could be covered with  
152 paper lids of different colors (orange and blue). Prior to the test, a habituation period has been

153 conducted, stepwise familiarizing the focal individuals with the test apparatus and procedure. First,  
154 individuals were habituated to take rewards from the feeders, afterwards, feeders have been  
155 partially covered with a white lid, training individuals to comfortably remove the lid in order to  
156 retrieve the reward. In each trial a reward was placed in one of the feeders outside the view of the  
157 focal animal. The lids were placed on the feeders and the apparatus positioned in front of the focal  
158 individual, who was then allowed to remove one of the two lids. The experiment consisted of two  
159 phases: an initial acquisition phase and a reversal phase. In the acquisition phase, one color was the  
160 rewarded (S+) stimulus, half of the birds started with orange as S+ the other half with blue as S+.  
161 The success criterion for the acquisition phase was that 80 % of trials were correct over two  
162 consecutive sessions. Once a subject met criterion the color-reward contingency was reversed in  
163 the reversal phase. In the acquisition phase, subjects were given a maximum of 140 trials to reach  
164 learning criterion, which one domestic fowl did not reach and consecutively was not tested in the  
165 reversal phase of the experiment. Tests of two further fowl could not be completed in the reversal  
166 phase due to time constraints. When a subject developed a positional bias (side bias), that is, when  
167 it chose one side in six consecutive trials, a side bias correction procedure was applied until that  
168 subject chose the non-preferred side once, whereupon we reverted to the normal pseudo-  
169 randomized trial schedule. Test sessions consisted of ten trials each. The rewarded size was pseudo-  
170 randomized, with each side being rewarded five times per session in the crows and maximum  
171 amount of rewarded trials on one side was seven and minimum of times a side was rewarded in  
172 one session was three in the chickens.

173

#### 174 *Statistical analysis*

175 Statistical analysis was performed in R v. 3.5.3 (The R Foundation for Statistical Computing,  
176 Vienna, Austria, <http://www.r-project.org>). Exact Wilcoxon-Mann-Whitney tests were computed in



177 the package coin (Hothorn et al., 2006). Spearman rank correlations were calculated using the  
178 package Hmisc (Harrell & Dupont, 2019). All datasets and the R script used to conduct the statistical  
179 analyses are available at <https://osf.io/q4jyk/>.

## 180 **Results**

181 Crows performed significantly better in the cylinder task compared to domestic fowl  
182 (Wilcoxon-Mann-Whitney Test:  $Z = -2.347$ ,  $n_1 = 9$ ,  $n_2 = 4$ ,  $p = 0.02$ ; Figure 1). Individual performance  
183 in the cylinder task ranged from 30 to 100 percent correct trials in crows and 10 to 40 percent  
184 correct trials in domestic fowl. In the reversal learning experiment, species did not significantly  
185 differ in the number of trials until learning criterion was reached (Wilcoxon-Mann-Whitney Test:  
186 acquisition phase:  $Z = -0.29$ ,  $n_1 = 9$ ,  $n_2 = 8$ ,  $p = 0.792$ ; reversal phase:  $Z = -1.559$ ,  $n_1 = 6$ ,  $n_2 = 8$ ,  $p =$   
187  $0.129$ ). In the acquisition phase of the experiment, individual performance in crows ranged from 30  
188 to 130 trials until learning criterion was reached and in domestic fowl from 30 to 140 trials. In the  
189 reversal phase, crows' performance ranged from 60 to 200 trials until learning criterion was  
190 reached and domestic fowls' performance ranged from 30 to 100 trials, however it should be noted  
191 that three fowl did not complete the reversal phase of the experiment (Table 1).

192

193 In crows, individuals who needed less trials to reach learning criterion in the acquisition  
194 phase also needed less trials to reach criterion in the reversal phase (Spearman correlation:  $r^2 =$   
195  $0.84$ ,  $n = 8$ ,  $p = 0.008$ ; Figure 2). This relationship was lacking in domestic fowl (Spearman  
196 correlation:  $r^2 = 0.48$ ,  $n = 6$ ,  $p = 0.329$ ; Figure 2). Performance in the learning task did not correlate  
197 with performance in the cylinder task in domestic fowl (Spearman correlation: acquisition phase:  $r^2$   
198  $= 0.08$ ,  $n = 9$ ,  $p = 0.833$ ; reversal phase:  $r^2 = 0.48$ ,  $n = 6$ ,  $p = 0.329$ ; Figure 3a). As we have only tested  
199 four crows in the cylinder task, we could not calculate a correlation between learning performance  
200 and performance in the cylinder task, but we graphically illustrated results in figure 3b.

201

## 202     **Discussion**

203             In the present study we describe crows to perform significantly better in a motor-inhibition  
204 task compared to domestic fowl. This is in line with previous results, suggesting corvids to perform  
205 well and fowl to perform poorly in the cylinder task (Ferreira et al., 2020; Kabadayi et al., 2016).  
206 This could indicate better motor-inhibition in crows compared to fowl. Motor inhibition and other  
207 aspects of self-control, along with working memory and cognitive flexibility, is considered an  
208 integral part of executive functioning in humans (Diamond, 2013). It could be argued that higher  
209 motor inhibitory control in corvids compared to fowls allows them to selectively attend and suppress  
210 prepotent motor impulses and therefore perform better in tasks requiring complex decision making  
211 processes, such as delay of gratification (Dufour et al., 2012; Hillemann et al., 2014), inequity  
212 aversion (Wascher & Bugnyar, 2013), tactical deception (Bugnyar, 2013), mental time travel  
213 (Clayton & Dickinson, 1998), and causal reasoning (Schloegl et al., 2009).

214

215             In the reversal learning task, crows and domestic fowl did not differ in performance,  
216 measured in the number of trials until learning criterion was reached, neither in the acquisition  
217 phase, nor the reversal phase of the experiment, although it should be noted that three individuals  
218 have not been tested until learning criterion was reached, due to time constraints. This is surprising  
219 as we would generally have expected a higher cognitive performance in crows compared to  
220 domestic fowl. In a previous study, red-billed blue magpies, *Urocissa erythroryncha*, significantly  
221 outperformed white leghorn chickens in a serial reversal task (Gossette et al., 1966). Our results  
222 highlight the importance to test a wide variety of species in order to draw final conclusions about  
223 the convergent evolution of cognitive skills in distantly related taxa. Traditionally, cognition  
224 research often focusses on a small group of species considered as ‘cognitively complex’ (Miller et  
225 al., 2019), but we suggest that more studies on ‘control species’ lacking cognitive abilities in

226 question are needed. Our results illustrate that certain cognitive abilities, *e.g.* learning abilities,  
227 might not differ between species considered as cognitively complex, *i.e.* crows, compared to  
228 species not considered to possess cognitively advanced skills, *i.e.* domestic fowl.

229

230 Further, in the reversal learning experiment we show pronounced individual differences in  
231 performance in both species tested. Crows reached learning criterion after 30 to 130 trials in the  
232 acquisition phase of the experiment and 60 to 200 trials in the reversal phase. Domestic fowl  
233 reached learning criterion after 30 to 140 trials in the acquisition phase and 30 to 100 trials in the  
234 reversal phase of the experiment. Individual variation in cognitive performance only recently came  
235 into focus of comparative cognition research (Boogert et al., 2018). Presently, we can only  
236 speculate about the causes of individual differences in our sample. Individual differences in learning  
237 performance can be caused physical characteristics of the environment (Pike et al., 2018), social  
238 factors (Dalesman, 2018) or differences in personality (Dougherty & Guillette, 2018).

239

240 In our experiment, we only found limited evidence for repeatability of cognitive  
241 performance. In crows, learning performance between the acquisition and reversal phase of the  
242 learning experiment was positively correlated. This relationship was lacking in domestic fowl.  
243 Further, we did not find a relationship between performance in the reversal learning experiment  
244 and cylinder task, neither in crows nor in domestic fowl. A lack of replicability of test results is a  
245 general issue in comparative cognition research (Farrar et al., 2020). In our case, the lack of  
246 replicability of individual cognitive performance between the learning experiment and cylinder task  
247 certainly can be due to small sample size and low power. However, the lack of correlation between  
248 performance in different tasks is certainly not a unique phenomenon in comparative cognition.

249

250 In dogs, inhibitory performance was not correlated across different tasks (Bray et al., 2014;  
251 Brucks et al., 2017). Wolves performed significantly poorer in the cylinder task compared to dogs,  
252 suggesting that domestication could affect inhibitory control (Marshall-Pescini et al., 2015). Several  
253 studies evidence a lack of correlation in performance between the acquisition and reversal learning  
254 phase (Guido et al., 2017).

255

256 One main advantage of the cylinder task is that it is easy and quick to conduct. The task  
257 requires low levels of habituation and training and can be successfully applied in a wide variety of  
258 species. However, the task is not uncontroversial and several authors question its suitability to  
259 assess motor inhibition (Farrar et al. 2020), especially supported by the fact that task performance  
260 is poorly correlated with other measures of inhibitory control (Bray et al., 2014; Brucks et al., 2017;  
261 Vernouillet et al., 2018). Size and material of the tube might matter. Cats performed best on larger  
262 cylinders (Bobrowicz & Osvath, 2018). Further, impulse control assessed in the cylinder task has  
263 been shown to be significantly affected by prior experience with transparent materials (van Horik et  
264 al., 2018) as well as response learning (van Horik et al., 2020). We can exclude that domestic fowl  
265 had prior experience with transparent materials, however crows might have had prior experience,  
266 for example with transparent plastic bottles, provided as enrichment to the captive crows.

267

268 In conclusion, the results of our experiments show crows to possess significantly better  
269 motor-inhibitory control compared to domestic fowl, which could be indicative of this specific  
270 aspect of executive functioning to be lacking in domestic fowl. In contrast learning performance in a  
271 reversal learning task did not differ between crows and domestic fowl, indicating similar levels of  
272 behavioural flexibility in both species.

273

274 **Acknowledgements**

275           We thank Christian Schloegl for assistance with the experimental procedure while  
276 conducting the cylinder task.

277

278 **Conflict of interest**

279 The authors declare no conflict of interest

280

281 **Author contributions**

282           Conceptualization: CAFW and GS; Data collection: CAFW, KA and GS; Formal analysis: CAFW;  
283 Writing: CAFW, KA and GS.

284

285

286 **References**

- 287 Bobrowicz, K., & Osvath, M. (2018). Cats parallel great apes and corvids in motor self-regulation –  
288 not brain but material size matters. *Frontiers in Psychology*, 9, 1995.  
289 <https://doi.org/10.3389/fpsyg.2018.01995>
- 290 Bogale, B. A., & Sugita, S. (2014). Shape discrimination and concept formation in the jungle crow  
291 (Corvus macrorhynchos). *Animal Cognition*, 17(1), 105–111. [https://doi.org/10.1007/s10071-](https://doi.org/10.1007/s10071-013-0642-y)  
292 013-0642-y
- 293 Boogert, N. J., Madden, J. R., Morand-Ferron, J., & Thornton, A. (2018). Measuring and  
294 understanding individual differences in cognition. *Philosophical Transactions of the Royal*  
295 *Society B: Biological Sciences*, 373(1756), 20170280. <https://doi.org/10.1098/rstb.2017.0280>
- 296 Bray, E. E., MacLean, E. L., & Hare, B. A. (2014). Context specificity of inhibitory control in dogs.  
297 *Animal Cognition*, 17(1), 15–31. <https://doi.org/10.1007/s10071-013-0633-z>
- 298 Bridgeman, J. M., & Tattersall, G. J. (2019). Tortoises develop and overcome position biases in a  
299 reversal learning task. *Animal Cognition*, 22(2), 265–275. [https://doi.org/10.1007/s10071-](https://doi.org/10.1007/s10071-019-01243-8)  
300 019-01243-8
- 301 Brucks, D., Marshall-Pescini, S., Wallis, L. J., Huber, L., & Range, F. (2017). Measures of dogs’  
302 inhibitory control abilities do not correlate across tasks. *Frontiers in Psychology*, 8, 849.  
303 <https://doi.org/10.3389/fpsyg.2017.00849>
- 304 Bugnyar, T. (2013). Social cognition in ravens. *Comparative Cognition & Behavior Reviews*, 8, 1–  
305 12. <https://doi.org/10.3819/ccbr.2013.80001>
- 306 Cauchoix, M., Hermer, E., Chaine, A. S., & Morand-Ferron, J. (2017). Cognition in the field:  
307 Comparison of reversal learning performance in captive and wild passerines. *Scientific*  
308 *Reports*, 7(1), 12945. <https://doi.org/10.1038/s41598-017-13179-5>
- 309 Clayton, N. S., & Dickinson, A. (1998). Episodic-like memory during cache recovery by scrub jays.  
310 *Nature*, 395(6699), 272–274. <https://doi.org/10.1038/26216>

- 311 Dalesman, S. (2018). Habitat and social context affect memory phenotype, exploration and  
312 covariance among these traits. *Philosophical Transactions of the Royal Society B: Biological*  
313 *Sciences*, 373(1756), 20170291. <https://doi.org/10.1098/rstb.2017.0291>
- 314 Diamond, A. (2013). Executive functions. *Annual Review of Psychology*, 64(1), 135–168.  
315 <https://doi.org/10.1146/annurev-psych-113011-143750>
- 316 Dougherty, L. R., & Guillette, L. M. (2018). Linking personality and cognition: A meta-analysis.  
317 *Philosophical Transactions of the Royal Society B: Biological Sciences*, 373(1756),  
318 20170282. <https://doi.org/10.1098/rstb.2017.0282>
- 319 Dufour, V., Wascher, C. A. F., Braun, A., Miller, R., & Bugnyar, T. (2012). Corvids can decide if a  
320 future exchange is worth waiting for. *Biology Letters*, 8(2), 201–204.  
321 <https://doi.org/10.1098/rsbl.2011.0726>
- 322 Dunbar, R. I. M. (1998). The social brain hypothesis. *Evolutionary Anthropology: Issues, News, and*  
323 *Reviews*, 6(5), 178–190.
- 324 Duque, J. F., & Stevens, J. R. (2017). Cylinder Task. In J. Vonk & T. Shackelford (Eds.),  
325 *Encyclopedia of Animal Cognition and Behavior* (pp. 1–5). Springer International Publishing.  
326 [https://doi.org/10.1007/978-3-319-47829-6\\_1608-1](https://doi.org/10.1007/978-3-319-47829-6_1608-1)
- 327 Farrar, B., Boeckle, M., & Clayton, N. (2020). Replications in comparative cognition: What should  
328 we expect and how can we improve? *Animal Behavior and Cognition*, 7(1), 1–22.  
329 <https://doi.org/10.26451/abc.07.01.02.2020>
- 330 Ferreira, V. H. B., Reiter, L., Germain, K., Calandreau, L., & Guesdon, V. (2020). Uninhibited  
331 chickens: Ranging behaviour impacts motor self-regulation in free-range broiler chickens (  
332 *Gallus gallus domesticus* ). *Biology Letters*, 16(1), 20190721.  
333 <https://doi.org/10.1098/rsbl.2019.0721>



- 334 Garnham, L., & Løvlie, H. (2018). Sophisticated fowl: The complex behaviour and cognitive skills  
335 of chickens and red junglefowl. *Behavioral Sciences*, 8(1), 13.  
336 <https://doi.org/10.3390/bs8010013>
- 337 Gibelli, J., Aubin-Horth, N., & Dubois, F. (2019). Individual differences in anxiety are related to  
338 differences in learning performance and cognitive style. *Animal Behaviour*, 157, 121–128.  
339 <https://doi.org/10.1016/j.anbehav.2019.09.008>
- 340 Gomes, A. C. R., Guerra, S., Silva, P. A., Marques, C. I., Trigo, S., Boogert, N. J., & Cardoso, G. C.  
341 (2020). Proactive common waxbills make fewer mistakes in a cognitive assay, the detour-  
342 reaching task. *Behavioral Ecology and Sociobiology*, 74(3), 1-15.  
343 <https://doi.org/10.1007/s00265-020-2809-2>
- 344 Gossette, R. L., Gossette, M. F., & Riddell, W. (1966). Comparisons of successive discrimination  
345 reversal performances among closely and remotely related avian species. *Animal Behaviour*,  
346 14(4), 560–564. [https://doi.org/10.1016/S0003-3472\(66\)80060-X](https://doi.org/10.1016/S0003-3472(66)80060-X)
- 347 Griffin, K. R., Beardsworth, C. E., Laker, P. R., van Horik, J. O., Whiteside, M. A., & Madden, J. R.  
348 (2020). The inhibitory control of pheasants (*Phasianus colchicus*) weakens when previously  
349 learned environmental information becomes unpredictable. *Animal Cognition*, 23(1), 189–  
350 202. <https://doi.org/10.1007/s10071-019-01328-4>
- 351 Guido, J. M., Biondi, L. M., Vasallo, A. I., & Muzio, R. N. (2017). Neophobia is negatively related  
352 to reversal learning ability in females of a generalist bird of prey, the Chimango Caracara,  
353 *Milvago chimango*. *Animal Cognition*, 20(4), 591–602. [https://doi.org/10.1007/s10071-017-](https://doi.org/10.1007/s10071-017-1083-9)  
354 1083-9
- 355 Harrell, F. Jr., & Dupont, C. (2019). *Frank Hmisc: Harrell Miscellaneous. R package version 4.3-0*.  
356 <https://CRAN.R-project.org/package=Hmisc>.

- 357 Hillemann, F., Bugnyar, T., Kotrschal, K., & Wascher, C. A. F. (2014). Waiting for better, not for  
358 more: Corvids respond to quality in two delay maintenance tasks. *Animal Behaviour*, *90*, 1–  
359 10. <https://doi.org/10.1016/j.anbehav.2014.01.007>
- 360 Hothorn, T., Hornik, K., van de Wiel, M., & Zeileis, A. (2006). A lego system for conditional  
361 inference. *The American Statistician*, *60*(3), 257–263. [https://doi.org/doi:  
362 10.1198/000313006X118430](https://doi.org/doi:10.1198/000313006X118430).
- 363 Isaksson, E., Utku Urhan, A., & Brodin, A. (2018). High level of self-control ability in a small  
364 passerine bird. *Behavioral Ecology and Sociobiology*, *72*(7), 118.  
365 <https://doi.org/10.1007/s00265-018-2529-z>
- 366 Izquierdo, A., Brigman, J. L., Radke, A. K., Rudebeck, P. H., & Holmes, A. (2017). The neural basis  
367 of reversal learning: An updated perspective. *Neuroscience*, *345*, 12–26.  
368 <https://doi.org/10.1016/j.neuroscience.2016.03.021>
- 369 Johnson-Ulrich, L., & Holekamp, K. E. (2020). Group size and social rank predict inhibitory control  
370 in spotted hyaenas. *Animal Behaviour*, *160*, 157–168.  
371 <https://doi.org/10.1016/j.anbehav.2019.11.020>
- 372 Johnson-Ulrich, L., Johnson-Ulrich, Z., & Holekamp, K. (2018). Proactive behavior, but not  
373 inhibitory control, predicts repeated innovation by spotted hyenas tested with a multi-access  
374 box. *Animal Cognition*, *21*(3), 379–392. <https://doi.org/10.1007/s10071-018-1174-2>
- 375 Kabadayi, C., Bobrowicz, K., & Osvath, M. (2018). The detour paradigm in animal cognition.  
376 *Animal Cognition*, *21*(1), 21–35. <https://doi.org/10.1007/s10071-017-1152-0>
- 377 Kabadayi, C., Taylor, L. A., von Bayern, A. M. P., & Osvath, M. (2016). Ravens, New Caledonian  
378 crows and jackdaws parallel great apes in motor self-regulation despite smaller brains. *Royal  
379 Society Open Science*, *3*(4), 160104. <https://doi.org/10.1098/rsos.160104>

- 380 Kumpan, L. T., Smeltzer, E. A., & Teichroeb, J. A. (2020). Animal cognition in the field:  
381 Performance of wild vervet monkeys (*Chlorocebus pygerythrus*) on a reversal learning task.  
382 *Animal Cognition*, 23(3), 523–534. <https://doi.org/10.1007/s10071-020-01356-5>
- 383 Langbein, J. (2018). Motor self-regulation in goats ( *Capra aegagrus hircus* ) in a detour-reaching  
384 task. *PeerJ*, 6, e5139. <https://doi.org/10.7717/peerj.5139>
- 385 Lucon-Xiccato, T., Gatto, E., & Bisazza, A. (2017). Fish perform like mammals and birds in  
386 inhibitory motor control tasks. *Scientific Reports*, 7(1), 13144.  
387 <https://doi.org/10.1038/s41598-017-13447-4>
- 388 MacLean, E. L., Hare, B., Nunn, C. L., Addessi, E., Amici, F., Anderson, R. C., Aureli, F., Baker, J.  
389 M., Bania, A. E., Barnard, A. M., Boogert, N. J., Brannon, E. M., Bray, E. E., Bray, J., Brent,  
390 L. J. N., Burkart, J. M., Call, J., Cantlon, J. F., Cheke, L. G., ... Zhao, Y. (2014). The  
391 evolution of self-control. *Proceedings of the National Academy of Sciences*, 111(20), E2140–  
392 E2148. <https://doi.org/10.1073/pnas.1323533111>
- 393 Marshall-Pescini, S., Virányi, Z., & Range, F. (2015). The effect of domestication on inhibitory  
394 control: Wolves and dogs compared. *PLOS ONE*, 10(2), e0118469.  
395 <https://doi.org/10.1371/journal.pone.0118469>
- 396 Miller, R., Boeckle, M., Jelbert, S. A., Frohnwieser, A., Wascher, C. A. F., & Clayton, N. S. (2019).  
397 Self-control in crows, parrots and nonhuman primates. *Wiley Interdisciplinary Reviews:*  
398 *Cognitive Science*, 10(6). <https://doi.org/10.1002/wcs.1504>
- 399 O’Hara, M., Huber, L., & Gajdon, G. K. (2015). The advantage of objects over images in  
400 discrimination and reversal learning by kea, *Nestor notabilis*. *Animal Behaviour*, 101, 51–60.  
401 <https://doi.org/10.1016/j.anbehav.2014.12.022>
- 402 Pike, T. W., Ramsey, M., & Wilkinson, A. (2018). Environmentally induced changes to brain  
403 morphology predict cognitive performance. *Philosophical Transactions of the Royal Society*  
404 *B: Biological Sciences*, 373(1756), 20170287. <https://doi.org/10.1098/rstb.2017.0287>

- 405 Range, F., Bugnyar, T., Schlägl, C., & Kotrschal, K. (2006). Individual and sex differences in  
406 learning abilities of ravens. *Behavioural Processes*, 73(1), 100–106.  
407 <https://doi.org/10.1016/j.beproc.2006.04.002>
- 408 Schloegl, C., Dierks, A., Gajdon, G. K., Huber, L., Kotrschal, K., & Bugnyar, T. (2009). What you  
409 see is what you get? Exclusion performances in ravens and keas. *PLoS ONE*, 4(8), e6368.  
410 <https://doi.org/10.1371/journal.pone.0006368>
- 411 Shettleworth, S. J. (2009). *Cognition, Evolution, and Behavior*. Oxford University Press.
- 412 Taylor, A. H. (2014). Corvid cognition: Corvid cognition. *Wiley Interdisciplinary Reviews:*  
413 *Cognitive Science*, 5(3), 361–372. <https://doi.org/10.1002/wcs.1286>
- 414 Teschke, I., Wascher, C. A. F., Scriba, M. F., von Bayern, A. M. P., Huml, V., Siemers, B., &  
415 Tebbich, S. (2013). Did tool-use evolve with enhanced physical cognitive abilities?  
416 *Philosophical Transactions of the Royal Society B: Biological Sciences*, 368(1630),  
417 20120418. <https://doi.org/10.1098/rstb.2012.0418>
- 418 van Horik, J. O., Beardsworth, C. E., Laker, P. R., Whiteside, M. A., & Madden, J. R. (2020).  
419 Response learning confounds assays of inhibitory control on detour tasks. *Animal Cognition*,  
420 23(1), 215–225. <https://doi.org/10.1007/s10071-019-01330-w>
- 421 van Horik, J. O., Langley, E. J. G., Whiteside, M. A., Laker, P. R., Beardsworth, C. E., & Madden, J.  
422 R. (2018). Do detour tasks provide accurate assays of inhibitory control? *Proceedings of the*  
423 *Royal Society B: Biological Sciences*, 285(1875), 20180150.  
424 <https://doi.org/10.1098/rspb.2018.0150>
- 425 Vernouillet, A. A. A., Stiles, L. R., Andrew McCausland, J., & Kelly, D. M. (2018). Individual  
426 performance across motoric self-regulation tasks are not correlated for pet dogs. *Learning &*  
427 *Behavior*, 46(4), 522–536. <https://doi.org/10.3758/s13420-018-0354-x>

- 428 Wascher, C. A. F. (2018). Corvids. In J. Vonk & T. Shackelford (Eds.), *Encyclopedia of Animal*  
429 *Cognition and Behavior* (pp. 1–12). Springer International Publishing.  
430 [https://doi.org/10.1007/978-3-319-47829-6\\_1799-1](https://doi.org/10.1007/978-3-319-47829-6_1799-1)
- 431 Wascher, C. A. F., & Bugnyar, T. (2013). Behavioral responses to inequity in reward distribution and  
432 working effort in crows and ravens. *PLoS ONE*, 8(2), e56885.  
433 <https://doi.org/10.1371/journal.pone.0056885>
- 434 Wascher, C. A. F., Dufour, V., & Bugnyar, T. (2012). Carrion crows cannot overcome impulsive  
435 choice in a quantitative exchange task. *Frontiers in Psychology*, 3.  
436 <https://doi.org/10.3389/fpsyg.2012.00118>
- 437 Wright, A. A., Magnotti, J. F., Katz, J. S., Leonard, K., Vernouillet, A., & Kelly, D. M. (2017).  
438 Corvids outperform pigeons and primates in learning a basic concept. *Psychological Science*,  
439 28(4), 437–444. <https://doi.org/10.1177/0956797616685871>
- 440 Zidar, J., Balogh, A., Favati, A., Jensen, P., Leimar, O., Sorato, E., & Løvlie, H. (2018). The  
441 relationship between learning speed and personality is age- and task-dependent in red  
442 junglefowl. *Behavioral Ecology and Sociobiology*, 72(10), 168.  
443 <https://doi.org/10.1007/s00265-018-2579-2>  
444

445 Table 1. Individuals tested in the present study. Number of trials until learning criterion is reached  
446 in the acquisition and reversal phase of the learning experiment as well as percentage of trials  
447 correct in the cylinder task. Missing values indicates that the respective individual has not  
448 completed the task (reversal task: three fowl; cylinder task four crows).

| <b>Name</b> | <b>Species</b> | <b>Sex</b> | <b>Acquisition</b> | <b>Reversal</b> | <b>Cylinder Task</b> |
|-------------|----------------|------------|--------------------|-----------------|----------------------|
| Baerchen    | crow           | male       | 30                 | 60              | 100                  |
| Gabi        | crow           | female     | 50                 | 90              |                      |
| Peter       | crow           | female     | 70                 | 110             | 90                   |
| Toeffel     | crow           | female     | 130                | 170             |                      |
| Klaus       | crow           | male       | 40                 | 60              | 70                   |
| Resa        | crow           | female     | 100                | 140             | 30                   |
| Nino        | crow           | female     | 90                 | 200             |                      |
| Walter      | crow           | male       | 100                | 160             |                      |
| BG          | chicken        | female     | 100                |                 | 10                   |
| DG          | chicken        | female     | 40                 | 80              | 30                   |
| LB          | chicken        | female     | 30                 | 90              | 20                   |
| N           | chicken        | female     | 60                 | 30              | 20                   |
| O           | chicken        | female     | 140                |                 | 40                   |
| P           | chicken        | female     | 60                 | 90              | 40                   |
| WH          | chicken        | female     | 120                |                 | 10                   |
| W           | chicken        | female     | 40                 | 80              | 10                   |
| Y           | chicken        | female     | 50                 | 100             | 30                   |

449

450

451

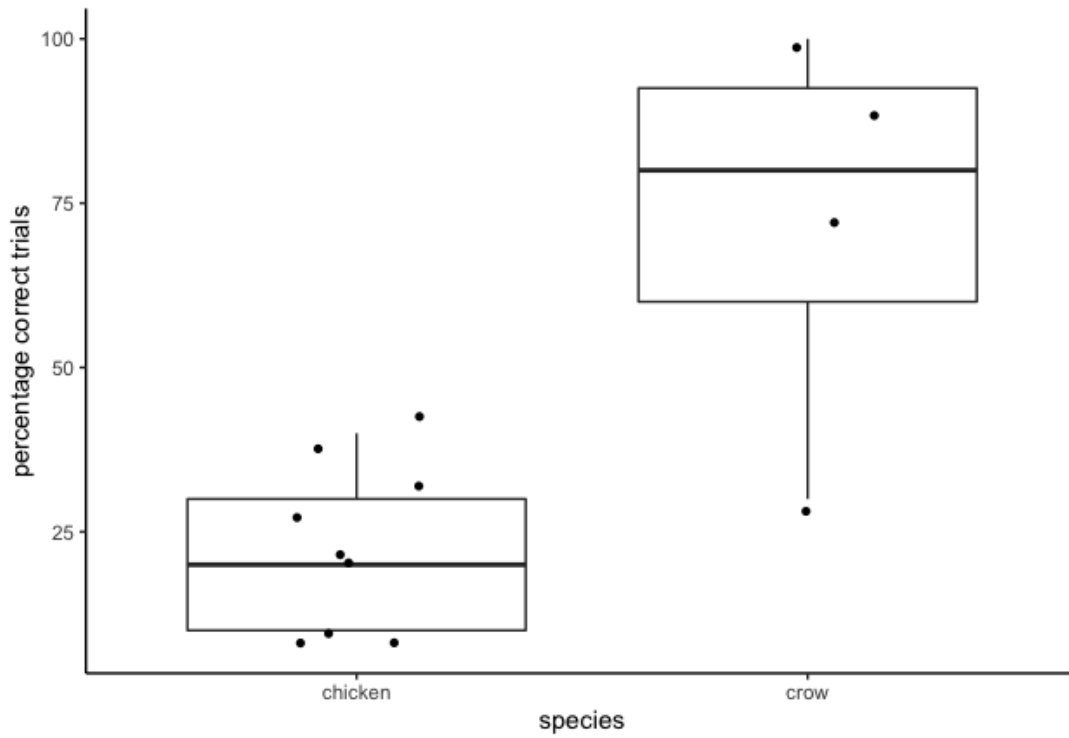

452

453 Figure 1. Percentage of correct test trials in the cylinder task. Box plots show the median and the

454 interquartile range from the 25th to the 75th percentiles, black circles represent individual

455 performance.

456

457

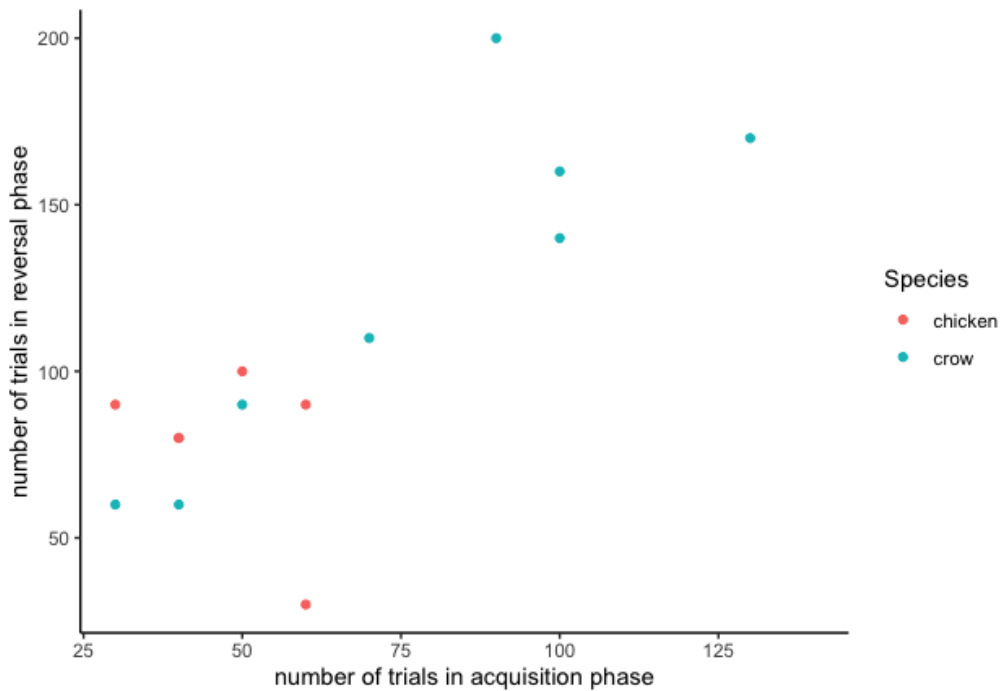

458

459 Figure 2. Relationship between learning performance in the acquisition phase (x-axis) and the

460 reversal phase (y-axis) in crows (blue circles) and domestic chickens (red circles).

461

462

463

464

465

466

467



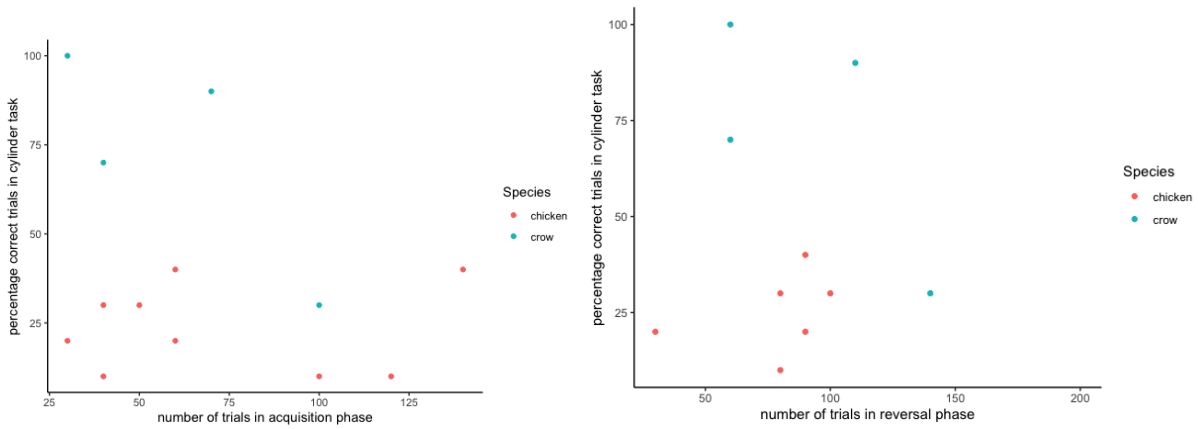

468

469 Figure 3. Relationship between learning performance in the acquisition phase (a) and reversal

470 phase (b) on the x-axis and performance in the cylinder task (y-axis) in crows (blue circles) and

471 domestic chickens (red circles).

472
